# Supplementary material
Source: Springer Nature journal article supplement (https://www.springermedizin.de/resource/supplementary/12913_2010_1720_MOESM2_ESM.pdf/9528824)

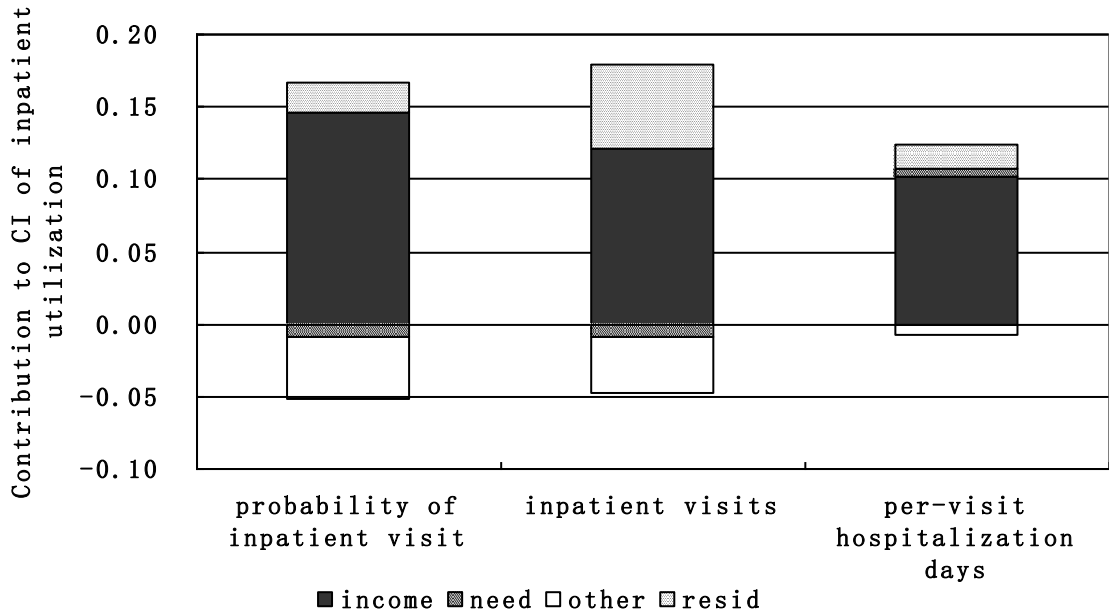

Supplement: MOESM2 [file 9528824]
